# Supplementary material for: ‘Care left undone’ during nursing shifts: associations with workload and perceived quality of care
Source: HighWire-hosted journal article supplement (doi:10.1136/bmjqs-2012-001767), 2013-07-29
Supplement: bmjqs-2012-001767supp_appendix.pdf [file bmjqs-2012-001767supp_appendix.pdf]

**Appendix 1: Model results for registered nurse staffing and individual aspects of missed care**

|                                                      | Patients per Registered Nurse |      |      |                    |      |      |                    |     |      |                     |      |     |      |      | $\chi^2_{sdf}$ | p     |       |
|------------------------------------------------------|-------------------------------|------|------|--------------------|------|------|--------------------|-----|------|---------------------|------|-----|------|------|----------------|-------|-------|
|                                                      | <u>up to 6.13</u>             |      |      | <u>6.14 - 7.33</u> |      |      | <u>7.40 - 9.25</u> |     |      | <u>9.33 - 11.50</u> |      |     |      |      |                |       |       |
|                                                      | OR                            | L95  | U95  | OR                 | L95  | U95  | OR                 | L95 | U95  | OR                  | L95  | U95 |      |      |                |       |       |
| <b>Adequate patient surveillance</b>                 | 0.39                          | 0.29 | 0.54 | §                  | 0.58 | 0.43 | 0.79               | §   | 0.72 | 0.54                | 0.97 | †   | 0.80 | 0.61 | 1.06           | 38.15 | <.001 |
| <b>Adequately document nursing care</b>              | 0.58                          | 0.41 | 0.81 | ‡                  | 1.01 | 0.74 | 1.40               |     | 1.23 | 0.90                | 1.67 |     | 0.98 | 0.74 | 1.31           | 26.34 | <.001 |
| <b>Comfort/talk with patients</b>                    | 0.49                          | 0.36 | 0.67 | §                  | 0.66 | 0.48 | 0.91               | †   | 0.82 | 0.60                | 1.11 |     | 0.86 | 0.65 | 1.15           | 25.71 | <.001 |
| <b>Skin care</b>                                     | 0.47                          | 0.32 | 0.68 | §                  | 0.77 | 0.54 | 1.09               |     | 0.80 | 0.57                | 1.12 |     | 0.80 | 0.59 | 1.10           | 17.04 | .002  |
| <b>Educating patients &amp; family</b>               | 0.70                          | 0.52 | 0.94 | †                  | 0.84 | 0.62 | 1.13               |     | 0.96 | 0.72                | 1.28 |     | 1.18 | 0.91 | 1.55           | 15.72 | .003  |
| <b>Develop/update nursing care plans/pathways</b>    | 0.63                          | 0.46 | 0.85 | ‡                  | 0.95 | 0.70 | 1.29               |     | 0.91 | 0.68                | 1.22 |     | 1.00 | 0.76 | 1.31           | 14.74 | .005  |
| <b>Oral hygiene<sup>1</sup></b>                      | 0.62                          | 0.45 | 0.87 | ‡                  | 0.86 | 0.62 | 1.18               |     | 0.96 | 0.70                | 1.29 |     | 0.90 | 0.67 | 1.19           | 10.49 | .033  |
| <b>Planning care</b>                                 | 0.63                          | 0.45 | 0.88 | ‡                  | 0.85 | 0.61 | 1.18               |     | 0.87 | 0.63                | 1.19 |     | 0.99 | 0.74 | 1.32           | 9.82  | .044  |
| <b>Treatments &amp; procedures</b>                   | 0.54                          | 0.34 | 0.87 | †                  | 0.75 | 0.48 | 1.17               |     | 0.97 | 0.63                | 1.47 |     | 0.91 | 0.61 | 1.35           | 9.24  | .055  |
| <b>Frequent changing of patient position</b>         | 0.71                          | 0.51 | 1.00 |                    | 1.01 | 0.73 | 1.39               |     | 0.96 | 0.70                | 1.31 |     | 0.97 | 0.72 | 1.29           | 6.68  | .154  |
| <b>Administer medications on time</b>                | 0.66                          | 0.46 | 0.94 | †                  | 0.89 | 0.63 | 1.26               |     | 0.90 | 0.64                | 1.25 |     | 0.84 | 0.62 | 1.15           | 6.14  | .189  |
| <b>Pain management</b>                               | 1.49                          | 0.81 | 2.73 |                    | 1.59 | 0.88 | 2.88               |     | 1.60 | 0.90                | 2.86 |     | 1.65 | 0.97 | 2.81           | 3.85  | .426  |
| <b>Prepare patients &amp; families for discharge</b> | 0.87                          | 0.61 | 1.24 |                    | 0.92 | 0.65 | 1.31               |     | 0.96 | 0.68                | 1.35 |     | 0.99 | 0.72 | 1.35           | 0.77  | .943  |

<sup>1</sup>. Odds ratios (OR) from main effects model (without the patients per RN x patients per HCA interaction).

<sup>2</sup>. 11.67 and over was the reference category for the calculation of ORs; OR for this category equals 1.

† < .05; ‡ < .01; § < .001
